# Supplementary material for: Sinus of Valsalva Aneurysm: A Rare Cause of Dyspnea
Source: Case Rep Med. 2015 Aug 24;2015:467935. doi: 10.1155/2015/467935 (PMC4561312; doi:10.1155/2015/467935)
Supplement: Supplementary file 1 — Video 1: Parasternal short axis view of the aortic valve. Left panel; shows markedly dilated left sinus of valsalva compared to the right and noncoronary cusps. Right panel; color flow Doppler demonstrates aortic regurgitant jet occupy > 25% of the left ventricular outflow tract area, which indicates moderate aortic regurgitation. Video 2: In right anterior oblique projection, contrast injection shows superiorly displaced left main coronary artery as well as severely dilated left sinus of valsalva. [file 467935.f1.zip]

Archive with 3 entries (2 files):
- mat.467935.v2/
- mat.467935.v2/Video 1.avi
- mat.467935.v2/Video 2 (1).avi
